# Supplementary material
Source: HighWire-hosted journal article supplement (https://diabetes.diabetesjournals.org/content/suppl/2009/08/18/db09-0165)
Supplement: db09-0165_Online_Appendix.pdf [file db09-0165_Online_Appendix.pdf]

**Supplementary data S1: Metabolic characteristics of the subjects**

|                                      | Control subjects<br><b>n = 15</b> | T2D matched control<br>subjects<br><b>n = 5</b> | T2D patients<br><b>n = 5</b> |
|--------------------------------------|-----------------------------------|-------------------------------------------------|------------------------------|
| Sex (M/F)                            | 6/10                              | 2/3                                             | 2/3                          |
| Age (yr)                             | 36 ± 3                            | 51 ± 2                                          | 50 ± 3                       |
| BMI (kg/m <sup>2</sup> )             | 22.6 ± 0.5                        | 24.64 ± 1.09                                    | 30.78 ± 1.2 *                |
| Fasting glucose (g/L)                | 0.87 ± 0.02                       | 0.91 ± 0.04                                     | 1.4 ± 0.08 *                 |
| Fasting insulin (mU/L)               | 6.9 ± 0.5                         | 6.2 ± 0.9                                       | 12.4 ± 2.5 *                 |
| NEFA (μM)                            | 538 ± 50                          | 527 ± 68                                        | 517 ± 37                     |
| <b>Clamp Study:</b>                  |                                   |                                                 |                              |
| Glucose (g/L)                        | 0.88 ± 0.02                       | 0.92 ± 0.06                                     | 0.98 ± 0.04                  |
| Insulin (mU/L)                       | 173 ± 8                           | 172 ± 9                                         | 184 ± 7                      |
| Glucose disposal rate<br>(mg/kg/min) | 10.2 ± 0.6                        | 11.2 ± 1.1                                      | 6.1 ± 1.1 *                  |
| NEFA (μM)                            | 38 ± 3                            | 39 ± 3                                          | 73 ± 15 *                    |

\*p < 0.05 when comparing type 2 diabetic patients (T2D) vs group of control subjects.

**Supplementary data S2: Primer sequences used in this study for qRT-PCR, sequencing and ChIP assay.**

| <b>Gene Names</b>                                     | <b>Forward primers</b>        | <b>Reverse primers</b>          |
|-------------------------------------------------------|-------------------------------|---------------------------------|
| DiGeorge syndrome critical region gene 8 (DGCR8)      | 5'-CTGGAAATCCTCATCCCTGA-3'    | 5'-TCCCAGGAACCACTTCAAAC-3'      |
| Nuclear RNase III (Drosha)                            | 5'-GACAAACAGAAGCTGGCACA-3'    | 5'-TGCATTAGGCATTGGTGGTA-3'      |
| Chromosome 20 open reading frame 166 (C20orf166)      | 5'-CACGTGGTCAGCTCCAAGT-3'     | 5'-AGCTGTTGCCCTTCACACAC-3'      |
| Mindbomb homolog 1, (MIB1)                            | 5'-ATGTGCTGTGGAGGGAAAAG-3'    | 5'-GACACACAGGGCACATTGTC-3'      |
| Dcr-1 homolog (Drosophila) (DICER1)                   | 5'-TGACTTGCTATGTGCGCTTG-3'    | 5'-TCTGGATCACATTTCCCATTT-3'     |
| Eukaryotic translation initiation factor 2C, 2 (AGO2) | 5'-CGTTTCTCCTCTGATGAGCTG-3'   | 5'-CTTCCTCAGCACTGTCATGTTC-3'    |
| Eukaryotic translation initiation factor 2C, 3 (AGO3) | 5'-CTTACCAGCTCTGCCACACTT-3'   | 5'-CTTCCTCAGCACTGTCATGTTC-3'    |
| Eukaryotic translation initiation factor 2C, 1 (AGO1) | 5'-ACTGCCCATTTGGCAACGAAC-3'   | 5'-CACAGACTCCAAGGGAACAG-3'      |
| Eukaryotic translation initiation factor 2C, 4 (AGO4) | 5'-ATGTGCTTGTGCCTCATCAA-3'    | 5'-GACCTTTGACTGTAGAGGA-3'       |
| Exportin 5 (XPO5)                                     | 5'-GGAAGCCCTCAAGTTTTGTG-3'    | 5'-GCTCCATGACACTGTTCTTC-3'      |
| adenosine deaminase, RNA-specific, B1, (ADARB1/ADAR2) | 5'-TGTAAGCACGCGCTGTACTGT-3'   | 5'-GACTCGTGGTATGTGGTAGGCTTAG-3' |
| Adenosine deaminase, RNA-specific (ADAR1)             | 5'-GCCAGTTCAGAAGAACTATGC-3'   | 5'-AAGCTGTTAGTCAGAGTGTGAAG-3'   |
| Hsa-pri-mir-1-1                                       | 5'-AAGGCTGTCCTGCTCACAC-3'     | 5'-TGTCTGGTGAGCACTTCCAC-3'      |
| Hsa-pri-mir-133a2                                     | 5'-CGGGTGTGTGTGTCTGTGTA-3'    | 5'-TACTTGGAGCTGACCACGTG-3'      |
| Hsa-pri-mir-1-2                                       | 5'-CACTGGATCTTCTTTTCCITTCA-3' | 5'-TCCACCAAGAATATGGAACC-3'      |
| Hsa-pri-mir-133a1                                     | 5'-AACCATTCTAGCTTTTCCAGGT-3'  | 5'-AGCGCAGGAAAACAGTAGGA-3'      |
| MEF2C binding region (ChIP)                           | 5'-GTGAAACAGGTATTTGGTTGC-3'   | 5'-GGCCTCTCCTTGTCTGATA-3'       |

**Supplementary data S3:** 192 miRNAs expressed in human muscle cells  
 Results are expressed as fold changes (myotubes vs myoblasts, for each subject)

miRNA identifications are from <http://microrna.sanger.ac.uk/>

| miRNA identifications | Subject 1 | Subject 2 | Subject 3 | Mean  | SEM  |
|-----------------------|-----------|-----------|-----------|-------|------|
| hsa-let-7a            | 1.05      | 1.75      | 0.72      | 1.17  | 0.3  |
| hsa-let-7b            | 1.33      | 0.99      | 0.7       | 1.01  | 0.18 |
| hsa-let-7c            | 1.67      | 1.40      | 0.86      | 1.31  | 0.23 |
| hsa-let-7d            | 1.38      | 0.83      | 0.58      | 0.93  | 0.23 |
| hsa-let-7e            | 1.61      | 2.11      | 1.20      | 1.64  | 0.26 |
| hsa-let-7f            | 0.82      | 2.75      | 0.65      | 1.41  | 0.67 |
| hsa-let-7g            | 1.36      | 1.73      | 0.67      | 1.25  | 0.31 |
| hsa-miR-1             | 3.43      | 5.44      | 0.73      | 3.20  | 1.36 |
| hsa-miR-100           | 0.64      | 0.55      | 0.80      | 0.67  | 0.07 |
| hsa-miR-101           | 1.94      | 1.82      | 0.80      | 1.52  | 0.36 |
| hsa-miR-103           | 0.72      | 1.54      | 0.56      | 0.94  | 0.30 |
| hsa-miR-106b          | 0.64      | 0.61      | 0.49      | 0.58  | 0.04 |
| hsa-miR-107           | 2.10      | 1.82      | 0.95      | 1.63  | 0.34 |
| hsa-miR-10a           | 0.75      | 0.74      | 0.95      | 0.82  | 0.06 |
| hsa-miR-10b           | 1.72      | 1.32      | 1.07      | 1.37  | 0.19 |
| hsa-miR-125a          | 0.96      | 1.11      | 1.71      | 1.26  | 0.22 |
| hsa-miR-125b          | 1.06      | 1.34      | 1.13      | 1.18  | 0.08 |
| hsa-miR-126           | 0.79      | 0.45      | 0.94      | 0.72  | 0.14 |
| hsa-miR-127           | 1.55      | 0.35      | 2.74      | 1.55  | 0.68 |
| hsa-miR-128b          | 15.17     | 17.75     | 3.00      | 11.97 | 4.54 |
| hsa-miR-130a          | 1.07      | 1.06      | 0.84      | 0.99  | 0.07 |
| hsa-miR-130b          | 0.74      | 0.72      | 0.76      | 0.74  | 0.01 |
| hsa-miR-132           | 3.00      | 1.44      | 1.47      | 1.97  | 0.51 |
| hsa-miR-133a          | 4.71      | 7.43      | 1.29      | 4.48  | 1.77 |
| hsa-miR-133b          | 2.20      | 1.72      | 1.06      | 1.66  | 0.33 |
| hsa-miR-134           | 0.74      | 0.19      | 3.90      | 1.61  | 1.15 |
| hsa-miR-135b          | 1.58      | 0.02      | 0.27      | 0.62  | 0.48 |
| hsa-miR-137           | 0.58      | 0.56      | 0.44      | 0.53  | 0.04 |
| hsa-miR-139           | 22.92     | 26.59     | 1.82      | 17.11 | 7.71 |
| hsa-miR-140           | 1.23      | 0.79      | 1.91      | 1.31  | 0.32 |
| hsa-miR-142-3p        | 0.71      | 0.24      | 0.71      | 0.55  | 0.15 |
| hsa-miR-143           | 6.65      | 13.62     | 2.39      | 7.55  | 3.27 |
| hsa-miR-145           | 3.06      | 24.91     | 5.33      | 11.10 | 6.93 |
| hsa-miR-146b          | 1.04      | 1.06      | 2.23      | 1.44  | 0.39 |
| hsa-miR-148a          | 1.85      | 1.06      | 1.13      | 1.35  | 0.25 |
| hsa-miR-148b          | 0.77      | 0.96      | 0.44      | 0.72  | 0.15 |
| hsa-miR-149           | 0.95      | 1.19      | 1.16      | 1.10  | 0.07 |
| hsa-miR-151           | 0.73      | 1.03      | 1.45      | 1.07  | 0.20 |
| hsa-miR-152           | 1.38      | 1.67      | 1.67      | 1.58  | 0.09 |
| hsa-miR-155           | 0.34      | 0.15      | 0.47      | 0.32  | 0.09 |
| hsa-miR-15a           | 0.74      | 0.82      | 0.74      | 0.77  | 0.02 |

|               |       |       |       |       |       |
|---------------|-------|-------|-------|-------|-------|
| hsa-miR-15b   | 0.25  | 0.29  | 0.38  | 0.31  | 0.03  |
| hsa-miR-16    | 0.47  | 0.35  | 0.92  | 0.58  | 0.17  |
| hsa-miR-17-3p | 22.58 | 0.35  | 10.18 | 11.03 | 6.43  |
| hsa-miR-17-5p | 1.10  | 0.70  | 0.62  | 0.81  | 0.14  |
| hsa-miR-181b  | 1.28  | 1.57  | 1.09  | 1.31  | 0.13  |
| hsa-miR-181c  | 1.54  | 1.52  | 1.18  | 1.41  | 0.11  |
| hsa-miR-181d  | 1.27  | 1.66  | 1.29  | 1.41  | 0.12  |
| hsa-miR-182   | 0.08  | 0.91  | 0.06  | 0.35  | 0.28  |
| hsa-miR-184   | 1.91  | 36.70 | 3.55  | 14.06 | 11.33 |
| hsa-miR-186   | 1.20  | 0.91  | 1.46  | 1.19  | 0.15  |
| hsa-miR-189   | 0.56  | 1.97  | 1.43  | 1.32  | 0.40  |
| hsa-miR-18a   | 0.68  | 0.73  | 0.44  | 0.61  | 0.09  |
| hsa-miR-190   | 0.84  | 0.80  | 0.01  | 0.55  | 0.26  |
| hsa-miR-191   | 0.78  | 0.74  | 1.16  | 0.89  | 0.13  |
| hsa-miR-192   | 2.66  | 0.84  | 0.65  | 1.38  | 0.64  |
| hsa-miR-193a  | 1.48  | 2.47  | 1.47  | 1.81  | 0.33  |
| hsa-miR-193b  | 2.09  | 3.52  | 0.67  | 2.09  | 0.82  |
| hsa-miR-194   | 1.75  | 1.09  | 1.04  | 1.29  | 0.23  |
| hsa-miR-195   | 0.47  | 0.65  | 0.73  | 0.62  | 0.07  |
| hsa-miR-196a  | 0.67  | 0.44  | 0.70  | 0.60  | 0.07  |
| hsa-miR-196b  | 0.63  | 0.51  | 0.75  | 0.63  | 0.06  |
| hsa-miR-197   | 0.76  | 0.84  | 1.02  | 0.87  | 0.07  |
| hsa-miR-199a  | 1.13  | 0.77  | 0.99  | 0.96  | 0.10  |
| hsa-miR-199b  | 0.61  | 0.39  | 1.03  | 0.68  | 0.18  |
| hsa-miR-19a   | 0.68  | 0.41  | 0.39  | 0.49  | 0.09  |
| hsa-miR-19b   | 0.85  | 0.49  | 0.44  | 0.60  | 0.12  |
| hsa-miR-200b  | 11.32 | 0.05  | 11.87 | 7.74  | 3.85  |
| hsa-miR-200c  | 1.57  | 0.12  | 0.18  | 0.62  | 0.47  |
| hsa-miR-203   | 11.41 | 3.31  | 0.10  | 4.94  | 3.36  |
| hsa-miR-204   | 0.68  | 0.33  | 0.24  | 0.42  | 0.13  |
| hsa-miR-206   | 1.60  | 1.31  | 1.15  | 1.36  | 0.13  |
| hsa-miR-208   | 11.37 | 13.36 | 11.67 | 12.13 | 0.61  |
| hsa-miR-20a   | 0.70  | 0.53  | 0.36  | 0.53  | 0.09  |
| hsa-miR-20b   | 0.70  | 0.54  | 0.37  | 0.53  | 0.09  |
| hsa-miR-21    | 1.98  | 1.92  | 0.62  | 1.51  | 0.44  |
| hsa-miR-210   | 0.69  | 0.56  | 1.57  | 0.94  | 0.31  |
| hsa-miR-213   | 1.38  | 2.02  | 0.88  | 1.42  | 0.33  |
| hsa-miR-214   | 0.93  | 0.25  | 0.64  | 0.61  | 0.19  |
| hsa-miR-218   | 1.24  | 1.55  | 1.09  | 1.29  | 0.13  |
| hsa-miR-22    | 1.60  | 1.73  | 1.53  | 1.62  | 0.05  |
| hsa-miR-221   | 0.41  | 0.45  | 0.55  | 0.47  | 0.04  |
| hsa-miR-222   | 0.25  | 0.28  | 0.82  | 0.45  | 0.18  |
| hsa-miR-223   | 0.07  | 6.79  | 0.17  | 2.34  | 2.22  |
| hsa-miR-224   | 1.44  | 0.68  | 1.76  | 1.29  | 0.32  |
| hsa-miR-23a   | 1.53  | 1.45  | 1.43  | 1.47  | 0.02  |
| hsa-miR-23b   | 2.09  | 1.53  | 1.16  | 1.59  | 0.26  |
| hsa-miR-24    | 1.33  | 1.38  | 1.29  | 1.33  | 0.02  |

|                |      |      |       |      |       |
|----------------|------|------|-------|------|-------|
| hsa-miR-25     | 0.63 | 1.16 | 0.50  | 0.77 | 0.20  |
| hsa-miR-26a    | 1.71 | 1.95 | 1.44  | 1.70 | 0.14  |
| hsa-miR-26b    | 0.91 | 0.76 | 0.63  | 0.77 | 0.08  |
| hsa-miR-27a    | 1.15 | 1.16 | 1.23  | 1.18 | 0.02  |
| hsa-miR-27b    | 1.73 | 1.16 | 0.75  | 1.21 | 0.28  |
| hsa-miR-28     | 0.67 | 0.77 | 0.73  | 0.72 | 0.028 |
| hsa-miR-296    | 1.04 | 1.13 | 0.81  | 1.00 | 0.09  |
| hsa-miR-299-3p | 0.30 | 0.09 | 23.93 | 8.11 | 7.91  |
| hsa-miR-299-5p | 0.68 | 0.75 | 0.64  | 0.69 | 0.03  |
| hsa-miR-29a    | 0.57 | 0.45 | 0.73  | 0.59 | 0.07  |
| hsa-miR-29c    | 1.09 | 0.71 | 0.73  | 0.84 | 0.12  |
| hsa-miR-301    | 0.70 | 0.58 | 0.32  | 0.53 | 0.11  |
| hsa-miR-30a-3p | 1.64 | 1.40 | 1.29  | 1.44 | 0.10  |
| hsa-miR-30a-5p | 2.20 | 2.15 | 0.68  | 1.68 | 0.49  |
| hsa-miR-30b    | 1.65 | 1.33 | 1.07  | 1.35 | 0.16  |
| hsa-miR-30c    | 1.73 | 1.46 | 1.18  | 1.45 | 0.15  |
| hsa-miR-30d    | 2.51 | 2.89 | 1.01  | 2.14 | 0.57  |
| hsa-miR-30e-3p | 1.33 | 1.02 | 1.12  | 1.16 | 0.09  |
| hsa-miR-30e-5p | 4.40 | 2.25 | 0.73  | 2.46 | 1.06  |
| hsa-miR-31     | 0.50 | 0.32 | 1.37  | 0.73 | 0.32  |
| hsa-miR-32     | 0.79 | 0.52 | 0.40  | 0.57 | 0.11  |
| hsa-miR-320    | 0.91 | 1.00 | 1.47  | 1.13 | 0.17  |
| hsa-miR-323    | 1.01 | 0.58 | 1.95  | 1.18 | 0.40  |
| hsa-miR-324-3p | 0.93 | 1.06 | 1.09  | 1.02 | 0.048 |
| hsa-miR-324-5p | 1.82 | 1.68 | 0.82  | 1.44 | 0.31  |
| hsa-miR-328    | 0.77 | 0.71 | 1.06  | 0.85 | 0.10  |
| hsa-miR-330    | 2.02 | 1.85 | 0.71  | 1.53 | 0.41  |
| hsa-miR-331    | 1.44 | 1.61 | 1.42  | 1.49 | 0.06  |
| hsa-miR-335    | 0.34 | 1.20 | 0.44  | 0.66 | 0.27  |
| hsa-miR-339    | 0.23 | 0.54 | 1.37  | 0.71 | 0.34  |
| hsa-miR-340    | 0.61 | 3.36 | 0.81  | 1.59 | 0.88  |
| hsa-miR-342    | 0.90 | 0.75 | 1.15  | 0.93 | 0.11  |
| hsa-miR-345    | 0.82 | 0.62 | 0.99  | 0.81 | 0.10  |
| hsa-miR-34a    | 1.20 | 1.06 | 0.55  | 0.94 | 0.19  |
| hsa-miR-34b    | 0.16 | 2.62 | 1.62  | 1.47 | 0.71  |
| hsa-miR-34c    | 2.04 | 0.41 | 3.18  | 1.88 | 0.80  |
| hsa-miR-361    | 1.64 | 1.50 | 1.47  | 1.53 | 0.05  |
| hsa-miR-362    | 1.30 | 1.61 | 1.43  | 1.45 | 0.09  |
| hsa-miR-365    | 1.11 | 1.63 | 1.04  | 1.26 | 0.18  |
| hsa-miR-374    | 1.07 | 0.80 | 0.65  | 0.84 | 0.12  |
| hsa-miR-376a   | 0.85 | 0.17 | 1.46  | 0.83 | 0.37  |

|                |       |       |        |       |       |
|----------------|-------|-------|--------|-------|-------|
| hsa-miR-378    | 2.98  | 28.62 | 0.90   | 10.83 | 8.91  |
| hsa-miR-379    | 1.71  | 0.60  | 1.26   | 1.19  | 0.32  |
| hsa-miR-381    | 0.68  | 0.12  | 11.58  | 4.13  | 3.72  |
| hsa-miR-382    | 1.65  | 0.88  | 2.38   | 1.64  | 0.43  |
| hsa-miR-409-5p | 11.34 | 0.05  | 3.92   | 5.10  | 3.31  |
| hsa-miR-410    | 0.69  | 0.34  | 4.67   | 1.90  | 1.38  |
| hsa-miR-411    | 1.40  | 0.56  | 2.30   | 1.42  | 0.50  |
| hsa-miR-422a   | 11.08 | 13.37 | 23.26  | 15.91 | 3.73  |
| hsa-miR-423    | 0.62  | 0.75  | 0.76   | 0.71  | 0.04  |
| hsa-miR-424    | 0.81  | 0.62  | 0.29   | 0.57  | 0.15  |
| hsa-miR-425    | 0.43  | 0.74  | 2.13   | 1.10  | 0.52  |
| hsa-miR-425-5p | 0.64  | 0.51  | 0.58   | 0.58  | 0.03  |
| hsa-miR-432    | 1.22  | 1.02  | 2.29   | 1.51  | 0.39  |
| hsa-miR-433    | 1.37  | 0.52  | 0.52   | 0.80  | 0.28  |
| hsa-miR-449    | 0.04  | 0.09  | 1.36   | 0.50  | 0.43  |
| hsa-miR-449b   | 0.10  | 0.04  | 9.10   | 3.08  | 3.00  |
| hsa-miR-450    | 1.48  | 0.75  | 0.31   | 0.84  | 0.33  |
| hsa-miR-452    | 1.26  | 1.69  | 0.85   | 1.27  | 0.24  |
| hsa-miR-484    | 1.28  | 0.89  | 1.37   | 1.18  | 0.14  |
| hsa-miR-485-3p | 1.01  | 0.14  | 1.86   | 1.00  | 0.49  |
| hsa-miR-485-5p | 0.88  | 0.05  | 189.75 | 63.56 | 63.09 |
| hsa-miR-486    | 0.64  | 0.61  | 0.46   | 0.57  | 0.05  |
| hsa-miR-487b   | 1.81  | 0.52  | 1.93   | 1.42  | 0.45  |
| hsa-miR-491    | 2.95  | 2.39  | 2.48   | 2.61  | 0.17  |
| hsa-miR-493    | 1.72  | 0.05  | 1.57   | 1.11  | 0.53  |
| hsa-miR-494    | 0.08  | 0.11  | 10.93  | 3.71  | 3.61  |
| hsa-miR-497    | 0.91  | 0.79  | 0.95   | 0.88  | 0.04  |
| hsa-miR-500    | 1.68  | 1.78  | 0.63   | 1.36  | 0.36  |
| hsa-miR-501    | 1.41  | 3.25  | 0.84   | 1.83  | 0.72  |
| hsa-miR-502    | 5.09  | 2.23  | 0.35   | 2.56  | 1.37  |
| hsa-miR-503    | 0.96  | 0.39  | 0.17   | 0.51  | 0.23  |
| hsa-miR-504    | 11.32 | 3.95  | 3.13   | 6.13  | 2.60  |
| hsa-miR-532    | 1.77  | 1.99  | 1.54   | 1.77  | 0.13  |
| hsa-miR-542-5p | 1.64  | 2.79  | 2.80   | 2.41  | 0.38  |
| hsa-miR-545    | 8.22  | 7.88  | 0.43   | 5.51  | 2.54  |
| hsa-miR-550    | 0.55  | 0.44  | 0.56   | 0.51  | 0.03  |
| hsa-miR-565    | 0.59  | 1.31  | 0.30   | 0.73  | 0.29  |
| hsa-miR-572    | 0.34  | 1.63  | 1.15   | 1.04  | 0.37  |
| hsa-miR-575    | 5.54  | 0.09  | 0.08   | 1.90  | 1.81  |
| hsa-miR-576    | 0.31  | 0.39  | 0.52   | 0.41  | 0.06  |
| hsa-miR-589    | 11.03 | 0.13  | 0.02   | 3.73  | 3.65  |
| hsa-miR-594    | 0.72  | 1.29  | 0.58   | 0.86  | 0.21  |
| hsa-miR-597    | 0.51  | 3.52  | 0.42   | 1.49  | 1.01  |
| hsa-miR-615    | 0.95  | 0.65  | 0.75   | 0.78  | 0.08  |

|             |       |       |      |       |       |
|-------------|-------|-------|------|-------|-------|
| hsa-miR-616 | 0.04  | 2.02  | 2.23 | 1.43  | 0.69  |
| hsa-miR-618 | 1.28  | 0.11  | 0.65 | 0.68  | 0.33  |
| hsa-miR-627 | 0.80  | 1.66  | 3.30 | 1.92  | 0.73  |
| hsa-miR-629 | 0.49  | 0.63  | 2.00 | 1.04  | 0.48  |
| hsa-miR-630 | 2.27  | 6.81  | 0.20 | 3.09  | 1.95  |
| hsa-miR-646 | 0.69  | 0.40  | 1.81 | 0.97  | 0.42  |
| hsa-miR-650 | 0.87  | 0.38  | 1.92 | 1.06  | 0.45  |
| hsa-miR-654 | 3.41  | 52.67 | 3.26 | 19.78 | 16.44 |
| hsa-miR-656 | 3.64  | 0.50  | 2.10 | 2.08  | 0.90  |
| hsa-miR-659 | 0.68  | 0.15  | 2.15 | 0.99  | 0.59  |
| hsa-miR-660 | 2.30  | 2.55  | 1.28 | 2.04  | 0.38  |
| hsa-miR-7   | 0.20  | 0.72  | 0.01 | 0.31  | 0.21  |
| hsa-miR-9   | 22.87 | 0.41  | 0.95 | 8.08  | 7.39  |
| hsa-miR-92  | 0.86  | 0.90  | 0.70 | 0.82  | 0.06  |
| hsa-miR-93  | 0.66  | 0.51  | 0.48 | 0.55  | 0.05  |
| hsa-miR-95  | 1.30  | 4.88  | 0.92 | 2.37  | 1.26  |
| hsa-miR-98  | 0.94  | 2.12  | 0.57 | 1.21  | 0.46  |
| hsa-miR-99a | 0.47  | 0.47  | 1.16 | 0.70  | 0.22  |
| hsa-miR-99b | 0.69  | 0.98  | 1.74 | 1.14  | 0.31  |

### Supplementary data S4

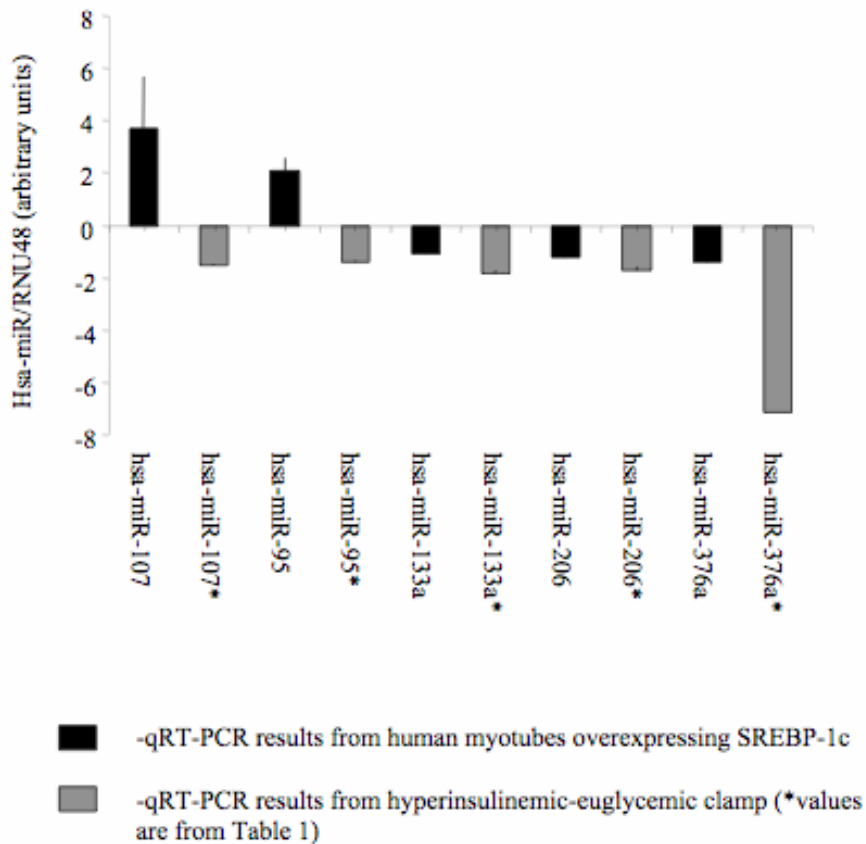

**Supplementary data S5:** Genes up-regulated by insulin during a 3h-hyperinsulinemic euglycemic clamp (n=6 subjects) and predicted as target of the 39 miRNAs down-regulated during hyperinsulinemia, in human skeletal muscle.

\*We considered genes targeted by at least 6 different miRNAs which corresponded to percentile 95th of the distribution of predicted miRNA target sites in 3'UTR, for the 11,863 genes expressed in muscle, when using predictions from TargetScan 4.2 (conserved site across Human, Mouse, Rat and Dog)

| Symbols  | Name                                                                 | Number of microRNA-mRNA pairs* | Mean fold change | LLID   |
|----------|----------------------------------------------------------------------|--------------------------------|------------------|--------|
| ABHD2    | Abhydrolase domain containing 2                                      | 12                             | 1.6              | 11057  |
| ABL1     | V-abl Abelson murine leukemia viral oncogene homolog 1               | 6                              | 1.23             | 25     |
| ALPK3    | Alpha-kinase 3                                                       | 6                              | 1.22             | 57538  |
| AMOTL2   | Angiomotin like 2                                                    | 8                              | 1.27             | 51421  |
| APC      | Adenomatosis polyposis coli                                          | 9                              | 1.20             | 324    |
| ARHGEF12 | Rho guanine nucleotide exchange factor (GEF) 12                      | 6                              | 1.22             | 23365  |
| ATP2A2   | ATPase, Ca <sup>++</sup> transporting, cardiac muscle, slow twitch 2 | 8                              | 1.35             | 488    |
| C2orf55  | Chromosome 2 open reading frame 55                                   | 6                              | 1.20             | 343990 |
| C5orf13  | Chromosome 5 open reading frame 13                                   | 8                              | 1.36             | 9315   |
| CALM3    | Calmodulin 3 (phosphorylase kinase, delta)                           | 6                              | 1.21             | 808    |
| CDC37L1  | Cell division cycle 37 homolog (S. cerevisiae)-like 1                | 7                              | 1.30             | 55664  |
| CDH13    | Cadherin 13, H-cadherin (heart)                                      | 8                              | 1.18             | 1012   |
| CHD9     | Chromodomain helicase DNA binding protein 9                          | 11                             | 1.33             | 80205  |
| CPEB2    | Cytoplasmic polyadenylation element binding protein 2                | 10                             | 1.20             | 132864 |
| CPEB3    | Cytoplasmic polyadenylation element binding protein 3                | 15                             | 1.21             | 22849  |
| CPEB4    | Cytoplasmic polyadenylation element binding protein 4                | 17                             | 1.34             | 80315  |
| DCUN1D4  | DCN1, defective in cullin neddylation 1, domain containing 4         | 6                              | 1.20             | 23142  |
| EBF3     | Early B-cell factor 3                                                | 9                              | 1.29             | 253738 |
| EPHB2    | EPH receptor B2                                                      | 7                              | 1.22             | 2048   |
| G3BP2    | GTPase activating protein (SH3 domain) binding protein 2             | 7                              | 1.28             | 9908   |
| GATA6    | GATA binding protein 6                                               | 6                              | 1.20             | 2627   |
| HOXA11   | Homeobox A11                                                         | 6                              | 1.22             | 3207   |
| IGF1R    | Insulin-like growth factor 1 receptor                                | 7                              | 1.20             | 3480   |
| KCTD5    | Potassium channel tetramerisation domain containing 5                | 8                              | 1.20             | 54442  |
| KIAA0241 | KIAA0241                                                             | 6                              | 1.36             | 23080  |
| KIF3A    | Kinesin family member 3A                                             | 7                              | 1.24             | 11127  |
| KLF13    | Kruppel-like factor 13                                               | 13                             | 1.53             | 51621  |
| KLF4     | Kruppel-like factor 4 (gut)                                          | 8                              | 3.90             | 9314   |
| KPNA1    | Karyopherin alpha 1 (importin alpha 5)                               | 7                              | 1.25             | 3836   |
| LATS2    | LATS, large tumor suppressor, homolog 2                              | 7                              | 1.20             | 26524  |
| MAB21L1  | Mab-21-like 1 (C. elegans)                                           | 8                              | 1.20             | 4081   |
| MAFG     | V-maf musculoaponeurotic fibrosarcoma oncogene homolog G             | 7                              | 1.36             | 4097   |
| MARK3    | MAP/microtubule affinity-regulating kinase 3                         | 7                              | 1.20             | 4140   |
| MBNL2    | Muscleblind-like 2                                                   | 13                             | 1.22             | 10150  |
| MECP2    | Methyl CpG binding protein 2                                         | 14                             | 1.32             | 4204   |
| MED13    | Mediator complex subunit 13                                          | 7                              | 1.21             | 9969   |
| MEX3B    | Mex-3 homolog B                                                      | 11                             | 1.23             | 84206  |
| MIER3    | Mesoderm induction early response 1, family member 3                 | 17                             | 1.20             | 166968 |

|          |                                                                      |    |      |        |
|----------|----------------------------------------------------------------------|----|------|--------|
| MTF1     | Metal-regulatory transcription factor 1                              | 6  | 1.43 | 4520   |
| NAP1L5   | Nucleosome assembly protein 1-like 5                                 | 8  | 1.32 | 266812 |
| NARG1    | NMDA receptor regulated 1                                            | 11 | 1.18 | 80155  |
| NAV1     | Neuron navigator 1                                                   | 11 | 1.40 | 89796  |
| NCOA1    | Nuclear receptor coactivator 1                                       | 8  | 1.36 | 8648   |
| NCOR2    | Nuclear receptor co-repressor 2                                      | 8  | 1.40 | 9612   |
| NEDD4    | Neural precursor cell expressed,<br>developmentally down-regulated 4 | 7  | 1.23 | 4734   |
| NIPBL    | Nipped-B homolog                                                     | 8  | 1.18 | 25836  |
| NOVA1    | Neuro-oncological ventral antigen 1                                  | 13 | 1.26 | 4857   |
| ORC2L    | Origin recognition complex, subunit 2-like                           | 7  | 1.21 | 4999   |
| OTUD4    | OTU domain containing 4                                              | 16 | 1.19 | 54726  |
| PCGF3    | Polycomb group ring finger 3                                         | 7  | 1.20 | 10336  |
| PDCD10   | Programmed cell death 10                                             | 9  | 1.32 | 11235  |
| PDE4D    | Phosphodiesterase 4D, cAMP-specific                                  | 7  | 1.37 | 5144   |
| PDIK1L   | PDLIM1 interacting kinase 1 like                                     | 6  | 1.20 | 149420 |
| PHACTR2  | Phosphatase and actin regulator 2                                    | 6  | 1.19 | 9749   |
| PHF15    | PHD finger protein 15                                                | 12 | 1.22 | 23338  |
| PIK3R1   | Phosphoinositide-3-kinase, regulatory subunit 1<br>(p85 alpha)       | 6  | 1.70 | 5295   |
| PNKD     | Paroxysmal nonkinesigenic dyskinesia                                 | 6  | 1.21 | 25953  |
| PRKCD    | Protein kinase C, delta                                              | 6  | 1.33 | 5580   |
| PTP4A1   | Protein tyrosine phosphatase type IVA, member<br>1                   | 10 | 1.24 | 7803   |
| PTPN9    | Protein tyrosine phosphatase, non-receptor type<br>9                 | 6  | 1.23 | 5780   |
| QKI      | Quaking homolog, KH domain RNA binding                               | 18 | 1.30 | 9444   |
| RARB     | Retinoic acid receptor, beta                                         | 12 | 1.55 | 5915   |
| RNF19A   | Ring finger protein 19A                                              | 6  | 1.22 | 25897  |
| RNF38    | Ring finger protein 38                                               | 7  | 1.20 | 152006 |
| SBK1     | SH3-binding domain kinase 1                                          | 7  | 1.18 | 388228 |
| SIX4     | SIX homeobox 4                                                       | 11 | 1.24 | 51804  |
| SLC25A25 | Solute carrier family 25, member 25                                  | 8  | 1.30 | 114789 |
| SOCS1    | Suppressor of cytokine signaling 1                                   | 6  | 1.70 | 8651   |
| SOX4     | SRY (sex determining region Y)-box 4                                 | 7  | 1.30 | 6659   |
| TDG      | Thymine-DNA glycosylase                                              | 11 | 1.20 | 6996   |
| TFDP1    | Transcription factor Dp-1                                            | 6  | 1.28 | 7027   |
| TGFBR1   | Transforming growth factor, beta receptor I                          | 7  | 1.30 | 7046   |
| TMEM47   | Transmembrane protein 47                                             | 6  | 1.20 | 83604  |
| TNRC6A   | Trinucleotide repeat containing 6A                                   | 10 | 1.31 | 27327  |
| UBE2D2   | Ubiquitin-conjugating enzyme E2D 2                                   | 6  | 1.19 | 7322   |
| UBE2W    | Ubiquitin-conjugating enzyme E2W                                     | 8  | 1.19 | 55284  |
| UBE3C    | Ubiquitin protein ligase E3C                                         | 6  | 1.26 | 9690   |
| UNC5C    | Unc-5 homolog C                                                      | 7  | 1.19 | 8633   |
| VAMP2    | Vesicle-associated membrane protein 2                                | 6  | 1.24 | 6844   |
| WDR82    | WD repeat domain 82                                                  | 8  | 1.25 | 80335  |
| ZBTB4    | Zinc finger and BTB domain containing 4                              | 8  | 1.28 | 57659  |
| ZCCHC14  | Zinc finger, CCHC domain containing 14                               | 7  | 1.31 | 23174  |
| ZNF644   | Zinc finger protein 644                                              | 6  | 1.35 | 84146  |
